# Supplementary material for: Assembling an alkyl rotor to access abrupt and reversible crystalline deformation of a cobalt(II) complex
Source: PubMed Central journal article supplement (PMC4667628; doi:10.1038/ncomms9810), 2015-11-04
Supplement: ncomms9810-s1.pdf [file ncomms9810-s1.pdf]

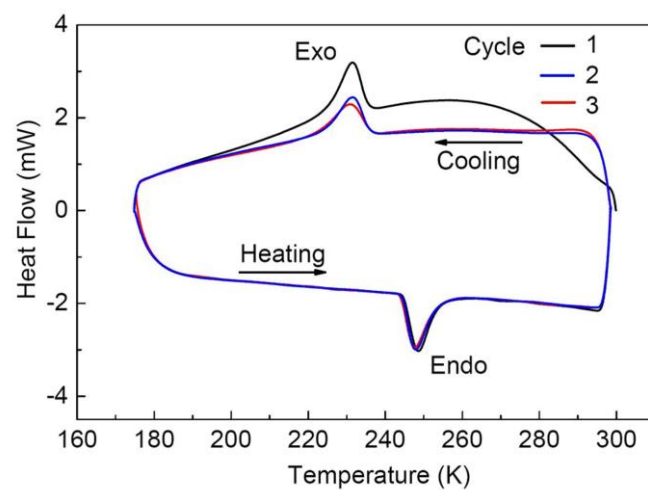

**Supplementary Figure 1** | Effect of thermal cycling on the phase transition in crystal **1**. DSC curves recorded at the rate of  $10 \text{ K min}^{-1}$ . Over three cycles, the sample behaved in an identical way and almost no changes in the phase-transition temperatures were observed.

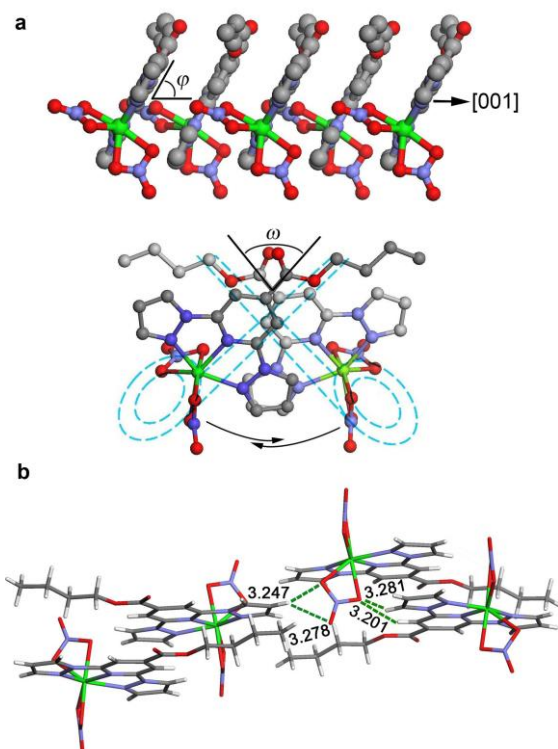

**Supplementary Figure 2** | Molecular stacking and interactions in the crystal **1** (low-temperature phase). **(a)** Atoms are shown in ball-and-stick representation. A perspective view of the columnar packing in the scissor-crossover mode. The staggered molecules stack in parallel with the molecular planes tiled at an angle  $\varphi$  of  $61.65^\circ$  relative to the [001] direction and the cross angle  $\omega$  of  $74.93^\circ$ . The blue dotted portion is the outline of the scissors. **(b)** 3D molecular packing viewed along  $[-1\ 0\ 1]$  is mainly stabilized by C–H $\cdots$ O interactions at distances of 3.201–3.281 Å. Green, Co; gray, C; white, H; blue, N; and red, O.

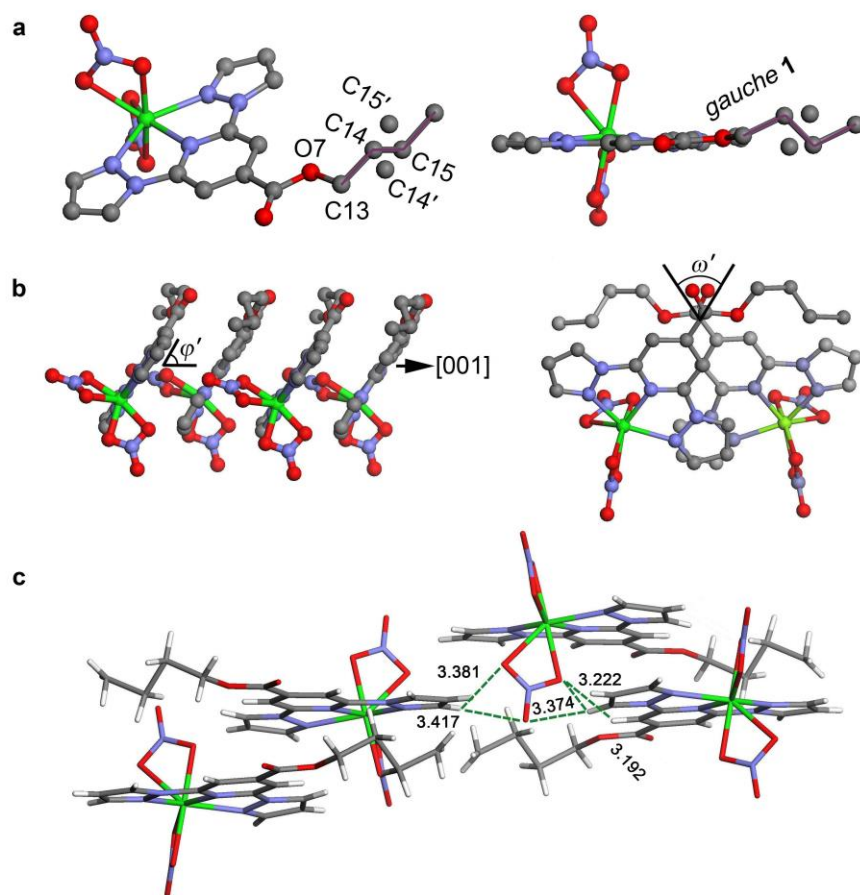

**Supplementary Figure 3** | Molecular structure, stacking and interactions in the crystal of **1** (high-temperature phase). (a) The most reasonable *gauche* conformation, *gauche 1* (purple), in the high-temperature phase. Two methylene carbon atoms of the *n*-butyl are disordered (C14, C14', C15, and C15'). We should note that the value of torsion angle O(7)-C(13)-C(14)-C(15) in *gauche 1* is not strictly 60° (Supplementary Table S2). (b) A perspective view of columnar packing in the scissor-crossover mode. The staggered molecules stack in parallel with the molecular planes tilted at an angle  $\varphi'$  of 60.25° relative to the [001] direction and at a cross angle  $\omega'$  of 65.73°. Hydrogen and disordered carbon atoms (C14' and C15') are omitted for clarity. c, 3D molecular packing viewed along [-1 0 1] is mainly stabilized by C-H...O interactions at distances from 3.192 to 3.417 Å. Green, Co; gray, C; white, H; blue, N; and red, O.

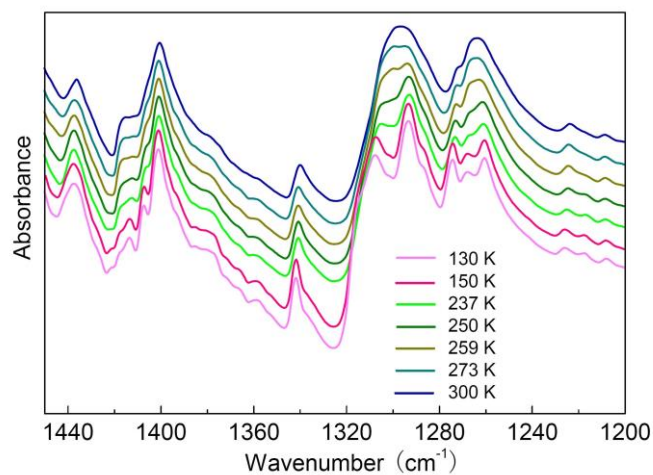

**Supplementary Figure 4** | Variable-temperature infrared absorbance spectra of **1** in the 1450 to 1200  $\text{cm}^{-1}$  region. In the spectrum of the low-temperature phase, the two peaks at 1307 and 1293  $\text{cm}^{-1}$ , which correspond to the  $\text{CH}_2$  wagging mode, are well identified. As the temperature is increased, the peak at 1307  $\text{cm}^{-1}$  becomes unrecognizable at temperatures near the phase-transition temperature; in the spectrum of the high-temperature phase, a broad peak is observed instead of the original two peaks. The smearing effect of the peaks over the region (1322–1278  $\text{cm}^{-1}$ ) suggests that, at around the phase transition temperature, the *n*-butyl groups become highly disordered<sup>1-3</sup>.

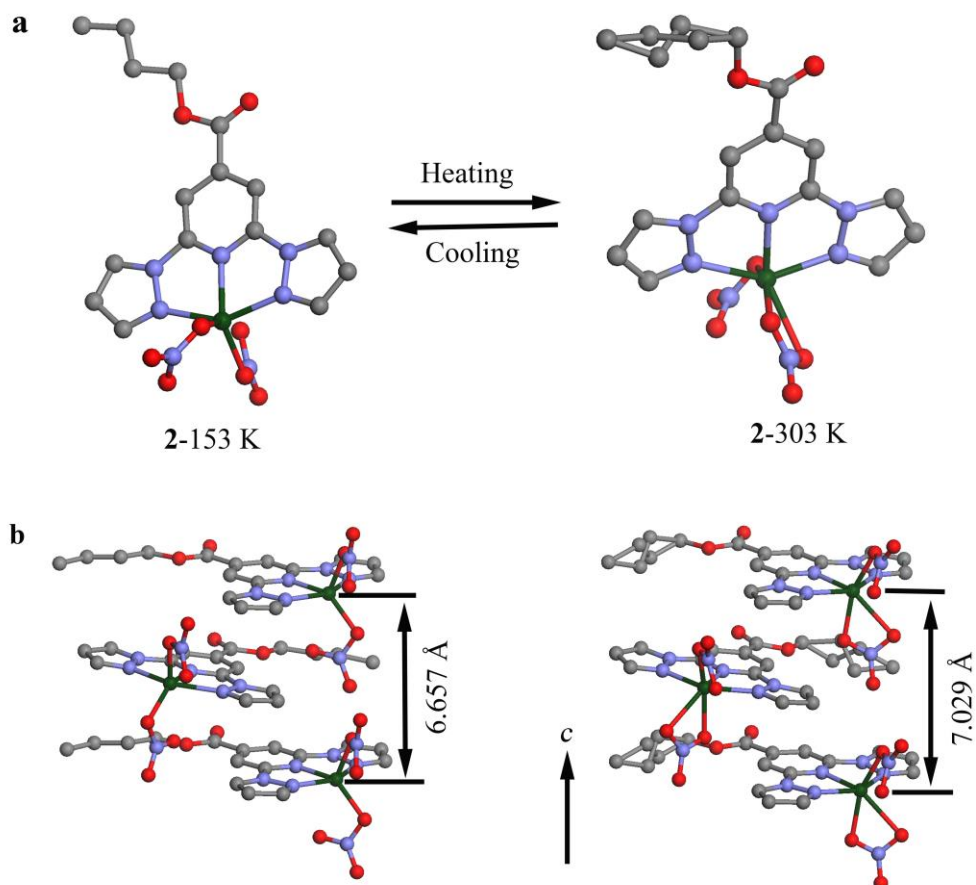

**Supplementary Figure 5** | Molecular structures of crystal **2** at 153 and 303 K. X-ray data of **1** shows that the ligand L has disorder. However, the X-ray data are unable to confirm whether the disorder is static or dynamic. Therefore, in order to measure solid-state  $^{13}\text{C}$  CP/MAS NMR, we synthesized  $[\text{Zn}(\text{NO}_3)_2(\text{L})]$  (complex **2**) as an analog to **1**, where the  $\text{Co}^{2+}$  is replaced with diamagnetic  $\text{Zn}^{2+}$ . The complex **2** exhibits phase transition at approximately 175 K (see **Supplementary Figure 6**), wherein structural change in **2** (**Supplementary Table 2**) is similar to that in **1**. (a) Two isomers could be reversibly transformed with rotation of the *n*-butyl group. At the high temperature, two methylene carbon atoms of the *n*-butyl are disordered. (b) The molecules stack in parallel along the *c*-axis with different distances between the molecules at the low- and high-temperature. Hydrogen atoms are omitted for clarity. Olive, Zn; gray, C; blue, N; and red, O. The solid-state  $^{13}\text{C}$  CP/MAS NMR data is shown in **Supplementary Figure 7**.

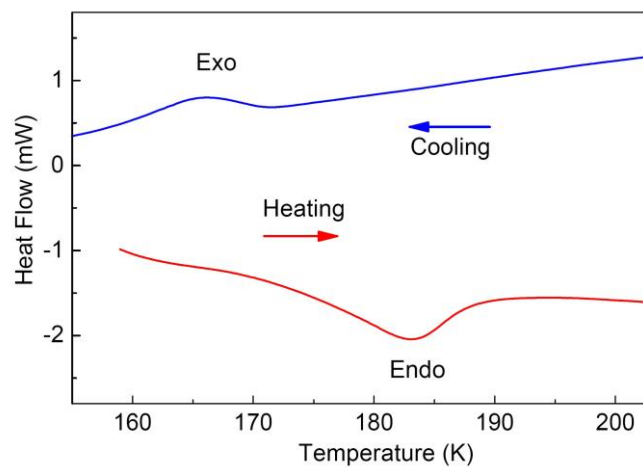

**Supplementary Figure 6** | Temperature dependence of differential scanning calorimetry (DSC) for **2**. DSC curves of crystal **2** recorded at the rate of  $10 \text{ K min}^{-1}$  during a cooling–heating (blue–red lines) cycle. The DSC curves for the crystals of **2** exhibit a single exothermic peak at 166 K during the cooling process. In contrast, the DSC traces of **2** exhibit an endothermic peak at 183 K during the heating process. Exo: exothermic peak; Endo: endothermic peak.

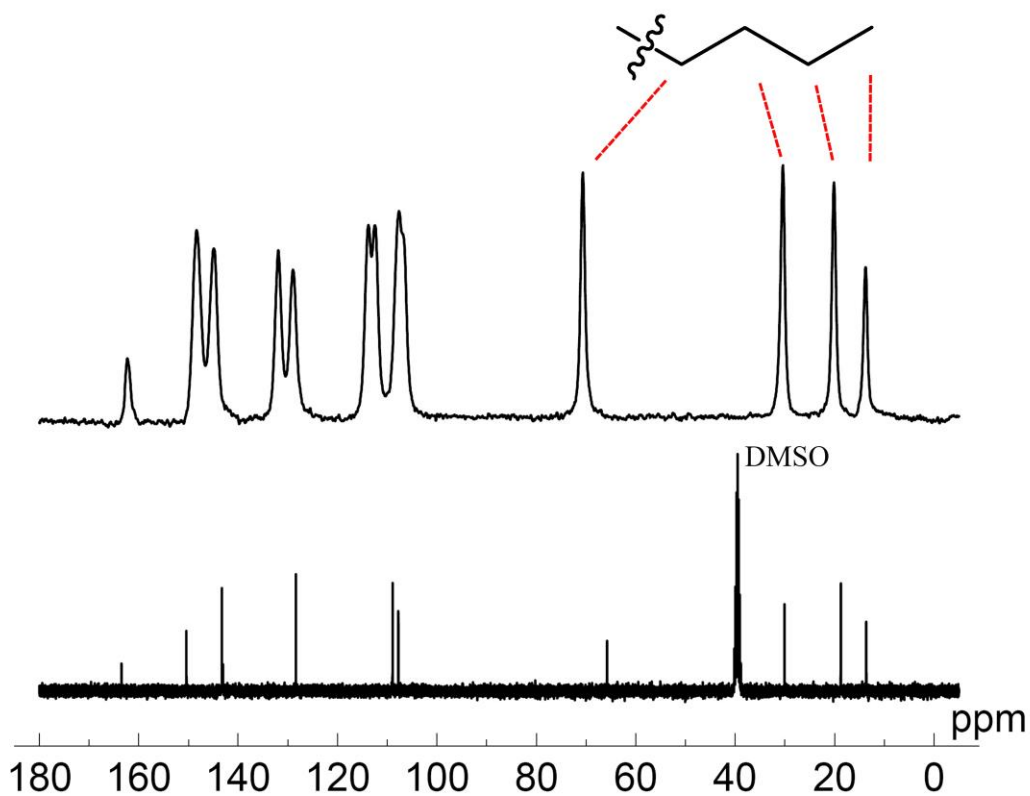

**Supplementary Figure 7** | (Top) solid-state (CP/MAS) and (bottom) solution ( $\text{DMSO-}d_6$ )  $^{13}\text{C}$  NMR spectra of **2** at room temperature. The spectrum is highly resolved, each nonequivalent carbon giving rise to a resonance, suggesting that the disorder in **2** is dynamic. This suggests that the disorder in **1** is dynamic. This conclusion is supported by temperature variation of the deuterium NMR spectrum of partially deuterated **2** (**Supplementary Figures 8–11**).

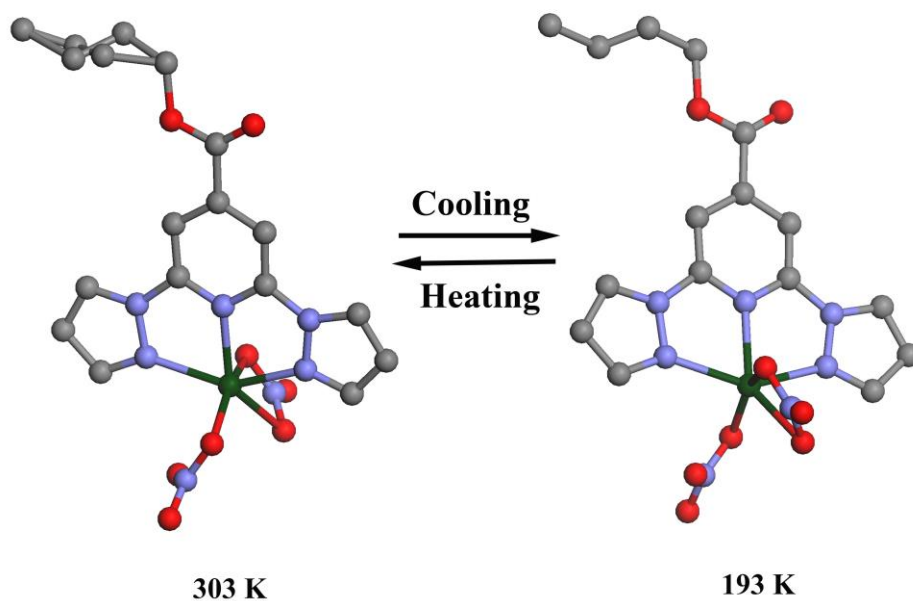

**Supplementary Figure 8** | Molecular structures of **2'** at 303 and 193 K during the cooling process.

Hydrogen and deuterium atoms are omitted for clarity. Olive, Zn; gray, C; blue, N; and red, O.

To measure the  $^2\text{H}$  NMR spectrum, we synthesized deuterated  $[\text{Zn}(\text{NO}_3)_2(\text{L-d}_9)]$  (complex **2'**). Complex **2'** exhibits a phase transition at approximately 206 K (see **Supplementary Figure 9**). Unfortunately, the structural change in **2'** (**Supplementary Table 3**) differs from those in **1** and **2**. However, the structure of **2'** at high temperature phase (303 K) is similar to those of complexes **1** and **2** with a disordered butyl group. Therefore, we measured the solid-state  $^2\text{H}$  NMR spectrum of **2'** to characterize the disorder of the *n*-butyl group (**Supplementary Figure 10**).



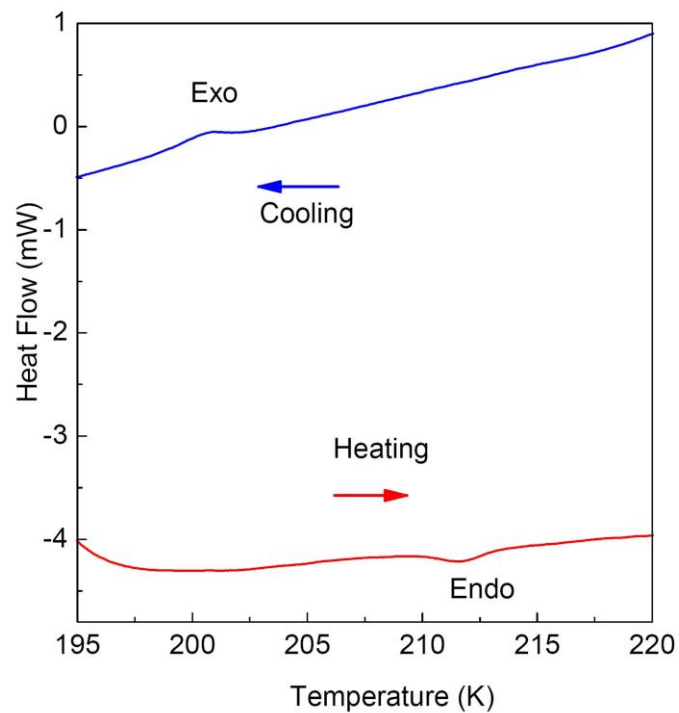

**Supplementary Figure 9** | Temperature dependence of differential scanning calorimetry (DSC) for **2'**. DSC curves for crystal **2'** recorded at  $5 \text{ K min}^{-1}$  during a cooling–heating (blue–red lines) cycle. The DSC curves for the crystals of **2'** exhibit a single exothermic peak at 201 K during the cooling process (220–195 K). In contrast, the DSC traces of **2'** exhibit an endothermic peak at 212 K during the heating process (195–220 K). Exo: exothermic peak; Endo: endothermic peak.

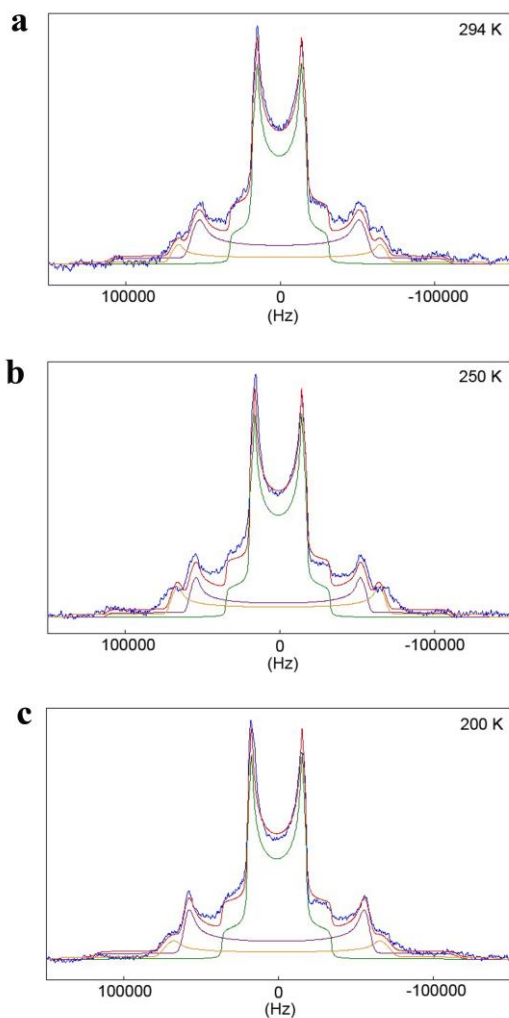

**Supplementary Figure 10** | Temperature variation of the deuterium NMR spectrum of *n*-butyl- $d_9$  group, (a) 294 K, (b) 250 K, and (c) 200 K. Concrete evidence of the dynamic disorder in **2** was obtained from the solid-state  $^2\text{H}$  NMR spectrum of partially deuterated **2** (complex **2'**). The observed spectra were analyzed by a DmFit program and apparent quadrupole parameters were obtained<sup>4</sup>. Three spectral components with different motional amplitudes of C–D bonds were distinguished between 294 and 200 K, shown as blue: observed, green: terminal methyl group, purple: two central methylene groups, orange: methylene-group-linked oxygen atom, and red: sum of the three components.

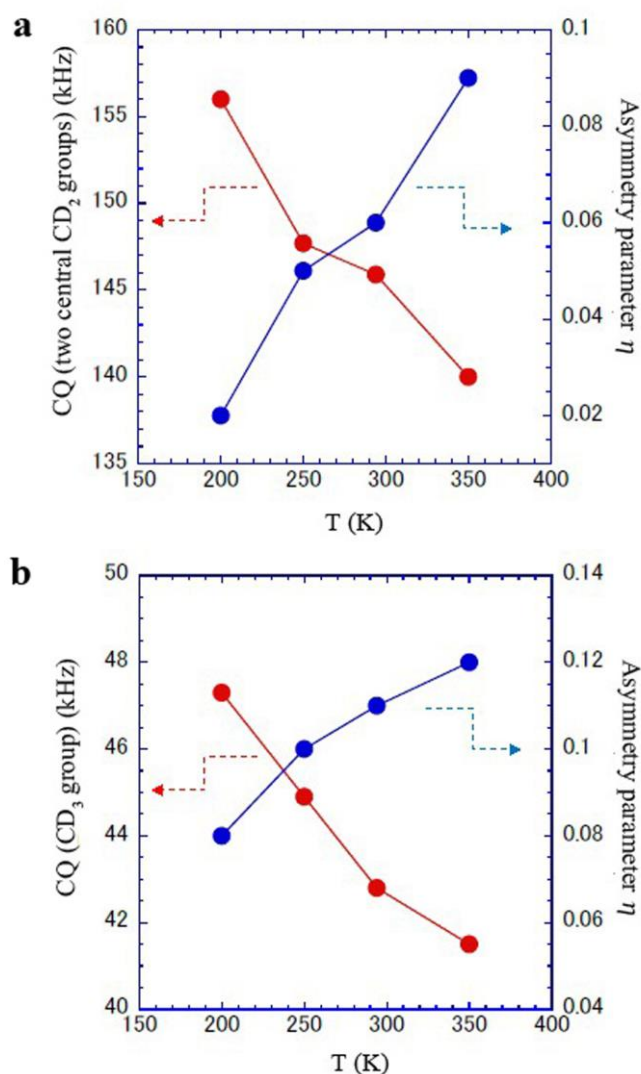

**Supplementary Figure 11** | Temperature variation of the quadrupole parameters, quadrupole coupling constant CQ and asymmetry parameter  $\eta$  of (a) two central methylene groups and (b) the terminal methyl group. Both figures (a) and (b) show a decrease of the effective CQ and an increase of  $\eta$  as temperature was increased, indicating a change in the angle of conical motion of directional vectors of C–D bonds of two central methylene groups and in the angle of conical motion of the C<sub>3</sub> rotation axis of the rapidly rotating terminal methyl group under rapid-motion limit. Defining the angle  $\theta$  between the axis of the cone and its slant, two possible values of  $\theta$  were estimated for both motions to be 15–20° or 165–160° between 200 and 350 K by simulation

of  $^2\text{H}$ -NMR spectra<sup>5,6</sup>, The motion of  $\text{C}_3$  rotation axis of the terminal methyl group was dragged by the motion of the two flexible central methylene groups. Typical quadrupole coupling parameters of the deuterium atom forming a C–D covalent bond are known to be  $\text{CQ} = 170\text{--}180$  kHz and  $\eta = 0.02$  for the static condition, which are almost independent of methyl or methylene group. The effective quadrupole coupling parameters are sensitive to motion of the direction of C–D bond<sup>7</sup> and CQ value of the rapidly rotating methyl group is *ca.* 52 kHz. C–D bonds of carbon atoms directly linked to an oxygen atom are almost static and their CQ values are close to 180 kHz (**Supplementary Figure 10**).

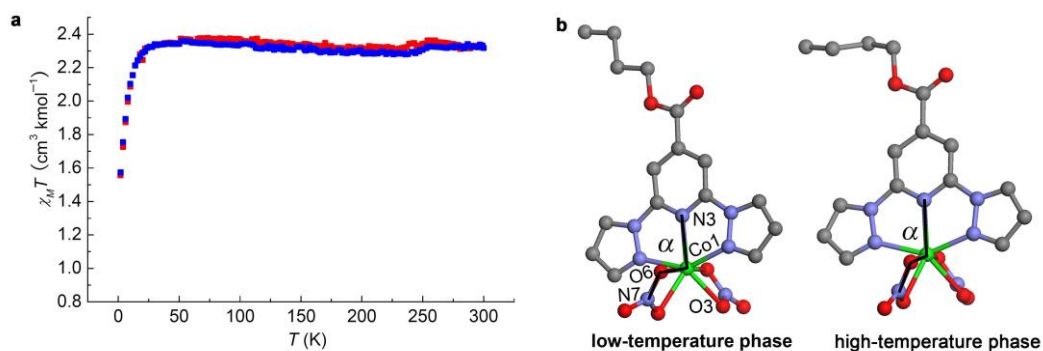

**Supplementary Figure 12** | Magnetic anomaly and the changes in the coordination environment of Co(II) ion. **(a)** Temperature dependence of magnetic susceptibility for **1** under cooling (red) and heating modes (blue). A step in the magnetic susceptibility is observed near the phase-transition temperature. **(b)** After the phase transition, the dihedral angle  $\alpha$  and the bond length of Co1–O3 change significantly because the nitrate ions are twisted (low-temperature phase:  $\alpha$ , 143.43°; Co1–O3, 2.198 Å; high-temperature phase:  $\alpha$ , 150.40°; Co1–O3, 2.342 Å). Gray, C; blue, N; and red, O.

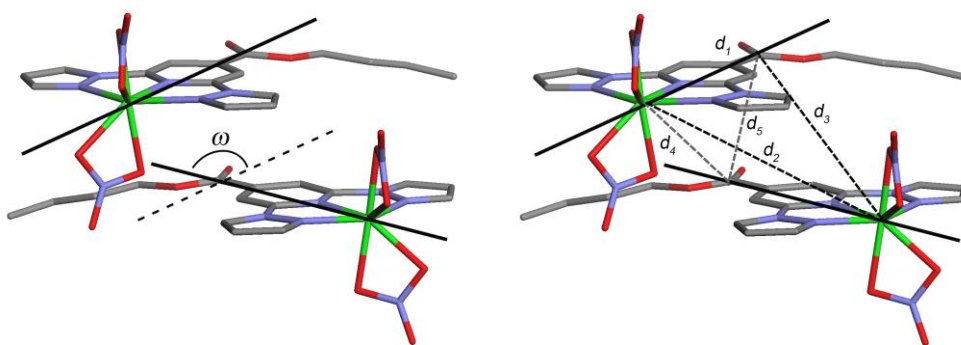

**Supplementary Figure 13** | The crossing angle  $\omega$  ( $\omega = 74.93^\circ$ ) of the adjacent molecules arranged in the mode of scissor-crossover. The value of  $\omega$  can be calculated by the cosine theorem (simplified formula,  $\sin [(\pi - \omega)/2] = (2d_1^2 - d_2^2 + d_3^2 + d_4^2 - d_5^2)^{1/2} / 2d_1$ ). The distances between atoms ( $d_1-d_5$ ) can be measured directly ( $d_1$ , 6.403 Å;  $d_2$ , 7.783 Å;  $d_3$ , 8.241 Å;  $d_4$ , 5.402 Å;  $d_5$ , 3.900 Å). Green, Co; gray, C; blue, N; and red, O.

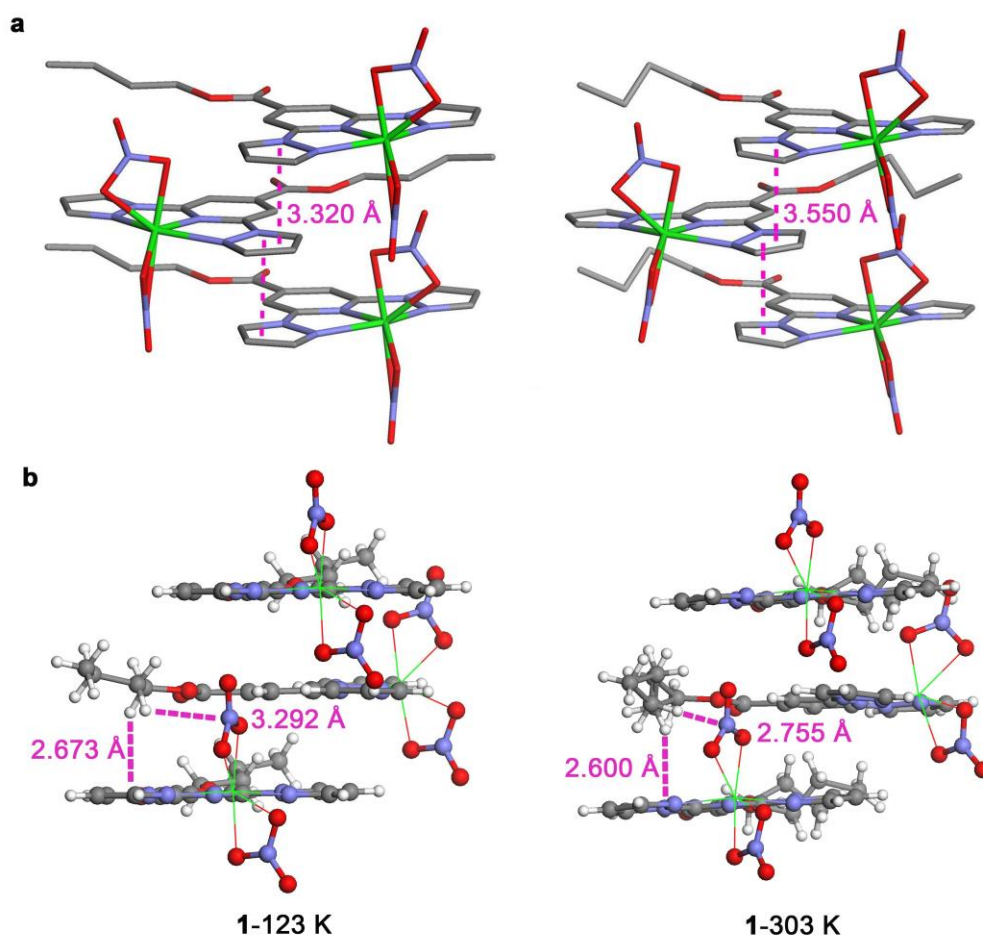

**Supplementary Figure 14** | The interactions and distances between adjacent molecules along the *c*-axis in the two phases of the crystal of **1**. **(a)** The  $\pi$ - $\pi$  interactions and distances between adjacent molecules. In complex **1**, the molecules are the large conjugated systems, and the molecules are arranged in a parallel-displaced geometry along the *c*-axis. **(b)** The shortest distances between the *n*-butyl group and the molecular planes of adjacent molecules are 2.673 and 2.600 Å in the low-temperature and high-temperature phase separately. Between the *n*-butyl group and the coordinated nitrate ions of adjacent molecules, the shortest distances are 3.292 and 2.755 Å (the distance of H $\cdots$ N) in the low-temperature and high-temperature phase separately. Green, Co; gray, C; blue, N; and red, O.

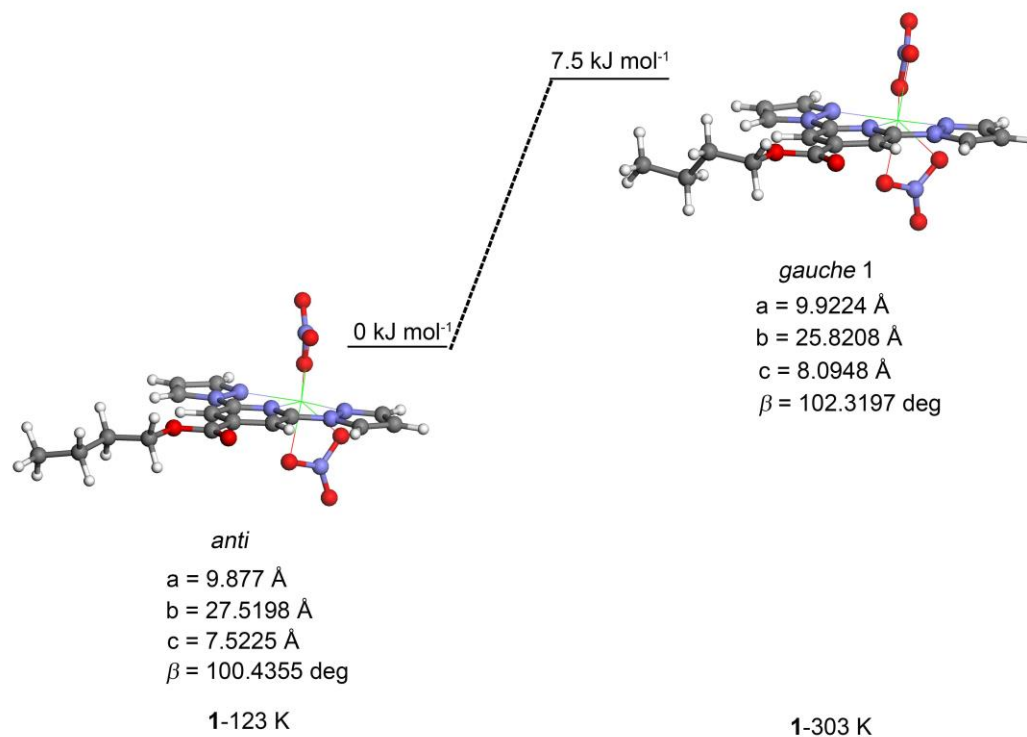

**Supplementary Figure 15** | Optimized structures and energies for the *anti* and *gauche* conformations of **1** (high-temperature phase and low-temperature phase). The structure in the *anti* conformation is 7.5 kJ mol<sup>-1</sup> more stable than that in the *gauche 1* conformation. Green, Co; gray, C; white, H; blue, N; and red, O.



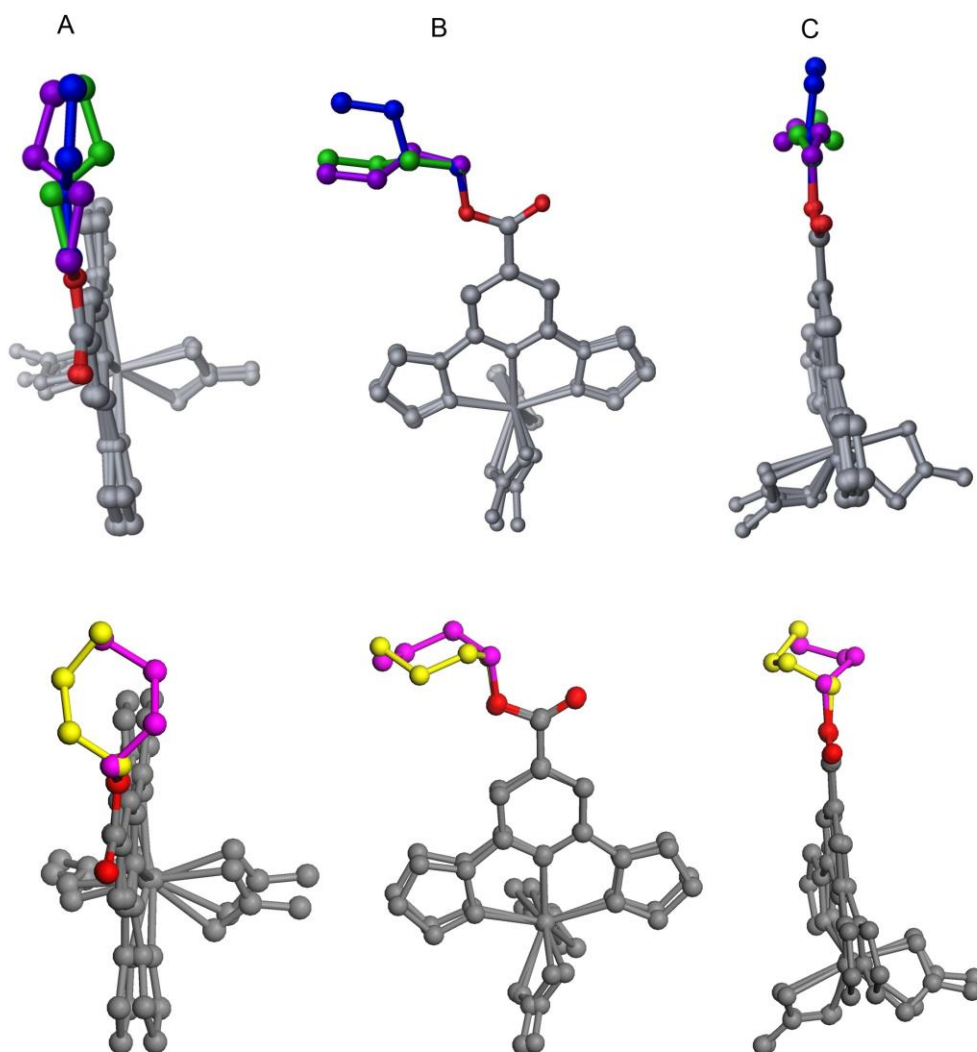

**Supplementary Figure 16** | Top (A) and side (B and C) views of superimposition of optimized structures of **1** in the *anti* and *gauche* conformations. Because two methylene carbon atoms (C14 and C15) are disordered in the high-temperature phase and each atom can occupy either of the two possible sites, three conformations, which are noted here as *gauche 1a*, **1b** and **1c**, other than *gauche 1* can be considered on the basis of the single-crystal analysis of the high-temperature phase. These optimized structures *gauche 1a*, **1b** and **1c** were obtained under the assumption that each structure is in a 100 % in the crystal. Blue, *anti*; green, *gauche 1*; purple, *gauche 1a*; pink, *gauche 1b*; yellow, *gauche 1c*; and red, oxygen atoms.

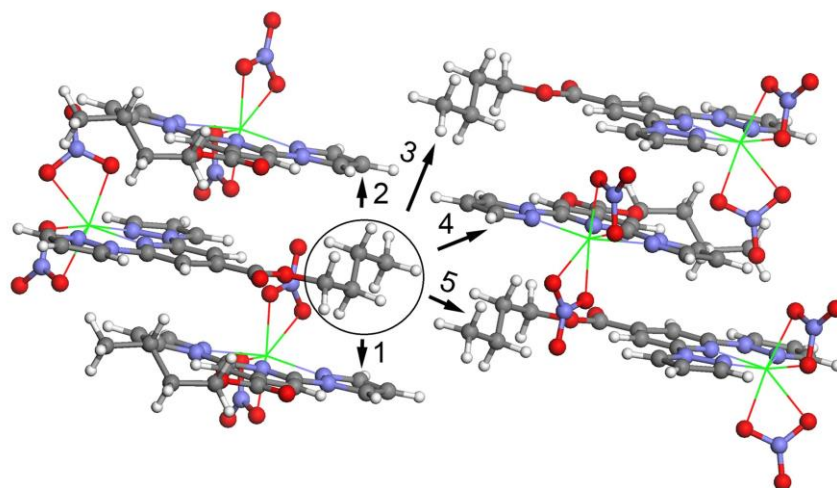

$$\Delta E = -9.4 \text{ kJ mol}^{-1} \text{ (1); } -1.8 \text{ kJ mol}^{-1} \text{ (2); } -0.4 \text{ kJ mol}^{-1} \text{ (3); } \\ 3.8 \text{ kJ mol}^{-1} \text{ (4); } 3.3 \text{ kJ mol}^{-1} \text{ (5)}$$

**Supplementary Figure 17** | Repulsive interactions calculated between the *n*-butyl group in the *gauche* conformation and the surrounding Co<sup>II</sup> complexes.  $\Delta E = E(\text{expand in } c\text{-direction}) - E(\text{contract in } c\text{-direction})$ , where  $E(\text{expand in } c\text{-direction})$  is the repulsive interaction in the expanded unit cell obtained by relaxing the unit-cell parameters and  $E(\text{contract in } c\text{-direction})$  is the repulsive interaction in the contracted structure obtained by keeping the unit-cell parameters fixed at the *anti* conformation. The negative values indicate that the repulsive interactions are reduced by the expansion of the unit cell in the *c*-direction. These values were obtained using the OPLS 2005 force field. Green, Co; gray, C; white, H; blue, N; and red, O.

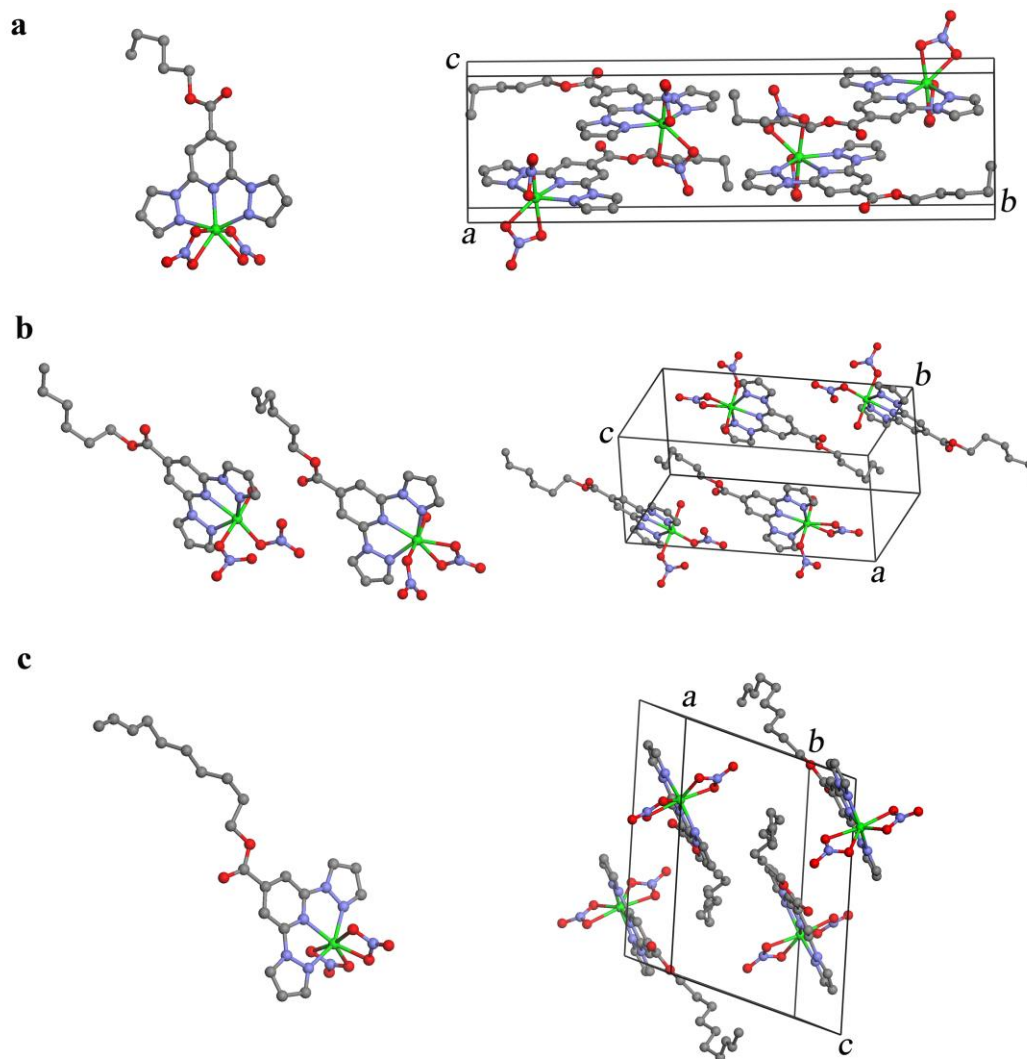

**Supplementary Figure 18** | Molecular structures and stacking in the crystals of (a) **3**, (b) **4**, and (c) **5** at 123 K. The molecules in crystal **3** stack in parallel with the scissor-crossover mode along the *c*-axis, as in crystal **1**. The molecular stacking in crystals **4** and **5** is completely different from in crystal **1**. Compared to the *anti* conformation of the butyl group in crystal **1**, the conformations of alkyl chains in crystals **3-5** are different and multiple. Atoms are shown in ball-and-stick representation. Green, Co; gray, C; white, H; blue, N; and red, O.

**Supplementary Table 1** | Table of crystallographic parameters for complex **1**.

| Complex <b>1</b> (on cooling)                                   |                                                                    |                                                                    |                                                                    |                                                                    |                                                                    |                                                                    |
|-----------------------------------------------------------------|--------------------------------------------------------------------|--------------------------------------------------------------------|--------------------------------------------------------------------|--------------------------------------------------------------------|--------------------------------------------------------------------|--------------------------------------------------------------------|
| T (K)                                                           | 303                                                                | 273                                                                | 238                                                                | 228                                                                | 183                                                                | 123                                                                |
| Formula                                                         | CoC <sub>16</sub> H <sub>17</sub><br>N <sub>7</sub> O <sub>8</sub> | CoC <sub>16</sub> H <sub>17</sub><br>N <sub>7</sub> O <sub>8</sub> | CoC <sub>16</sub> H <sub>17</sub><br>N <sub>7</sub> O <sub>8</sub> | CoC <sub>16</sub> H <sub>17</sub><br>N <sub>7</sub> O <sub>8</sub> | CoC <sub>16</sub> H <sub>17</sub><br>N <sub>7</sub> O <sub>8</sub> | CoC <sub>16</sub> H <sub>17</sub><br>N <sub>7</sub> O <sub>8</sub> |
| Formula weight                                                  | 494.30                                                             | 494.30                                                             | 494.30                                                             | 494.30                                                             | 494.30                                                             | 494.30                                                             |
| Crystal system                                                  | Monoclinic                                                         | Monoclinic                                                         | Monoclinic                                                         | Monoclinic                                                         | Monoclinic                                                         | Monoclinic                                                         |
| Space group                                                     | <i>P</i> 2 <sub>1</sub> / <i>c</i>                                 | <i>P</i> 2 <sub>1</sub> / <i>c</i>                                 | <i>P</i> 2 <sub>1</sub> / <i>c</i>                                 | <i>P</i> 2 <sub>1</sub> / <i>c</i>                                 | <i>P</i> 2 <sub>1</sub> / <i>c</i>                                 | <i>P</i> 2 <sub>1</sub> / <i>c</i>                                 |
| <i>a</i> (Å)                                                    | 9.8533(13)                                                         | 9.8490(11)                                                         | 9.8458(15)                                                         | 9.7984(18)                                                         | 9.7948(18)                                                         | 9.794(3)                                                           |
| <i>b</i> (Å)                                                    | 25.995(3)                                                          | 25.942(3)                                                          | 25.898(4)                                                          | 27.410(5)                                                          | 27.435(5)                                                          | 27.475(9)                                                          |
| <i>c</i> (Å)                                                    | 8.1782(10)                                                         | 8.1610(9)                                                          | 8.1434(14)                                                         | 7.6404(16)                                                         | 7.5979(15)                                                         | 7.548(3)                                                           |
| $\beta$ (deg)                                                   | 100.741(2)                                                         | 100.764(2)                                                         | 100.839(3)                                                         | 100.082(4)                                                         | 100.265(5)                                                         | 100.433(8)                                                         |
| V (Å <sup>3</sup> )                                             | 2058.1(5)                                                          | 2048.5(4)                                                          | 2039.4(6)                                                          | 2020.3(7)                                                          | 2009.0(7)                                                          | 1997.5(11)                                                         |
| Z                                                               | 4                                                                  | 4                                                                  | 4                                                                  | 4                                                                  | 4                                                                  | 4                                                                  |
| D <sub>calcd</sub> (g cm <sup>-3</sup> )                        | 1.595                                                              | 1.603                                                              | 1.610                                                              | 1.625                                                              | 1.634                                                              | 1.644                                                              |
| <i>F</i> (000)                                                  | 1012                                                               | 1012                                                               | 1012                                                               | 1012                                                               | 1012                                                               | 1012                                                               |
| data collected                                                  | 17031                                                              | 16941                                                              | 16901                                                              | 16695                                                              | 15678                                                              | 16278                                                              |
| unique data                                                     | 3810                                                               | 3763                                                               | 3742                                                               | 3723                                                               | 3656                                                               | 3672                                                               |
| <i>R</i> (int)                                                  | 0.0492                                                             | 0.0284                                                             | 0.0283                                                             | 0.0312                                                             | 0.0487                                                             | 0.0375                                                             |
| GOF on <i>F</i> <sup>2</sup>                                    | 1.310                                                              | 1.081                                                              | 1.062                                                              | 1.086                                                              | 1.192                                                              | 1.053                                                              |
| <i>R</i> <sub>I</sub> <sup>a</sup> [ <i>I</i> > 2σ( <i>I</i> )] | 0.0728                                                             | 0.0335                                                             | 0.0310                                                             | 0.0309                                                             | 0.0470                                                             | 0.0301                                                             |
| $\omega R_2^b$ (all data)                                       | 0.1663                                                             | 0.0845                                                             | 0.0808                                                             | 0.0776                                                             | 0.2094                                                             | 0.0728                                                             |

<sup>a</sup>  $R_I = \Sigma ||F_o| - |F_c|| / \Sigma |F_o|$ . <sup>b</sup>  $\omega R_2 = \{\Sigma [\omega(F_o^2 - F_c^2)^2] / \Sigma [\omega(F_o^2)^2]\}^{1/2}$

| Complex 1 (on heating)                                                 |                                                                 |                                                                 |                                                                 |                                                                 |                                                                 |
|------------------------------------------------------------------------|-----------------------------------------------------------------|-----------------------------------------------------------------|-----------------------------------------------------------------|-----------------------------------------------------------------|-----------------------------------------------------------------|
| T (K)                                                                  | 183                                                             | 243                                                             | 253                                                             | 273                                                             | 303                                                             |
| Formula                                                                | CoC <sub>16</sub> H <sub>17</sub> N <sub>7</sub> O <sub>8</sub> | CoC <sub>16</sub> H <sub>17</sub> N <sub>7</sub> O <sub>8</sub> | CoC <sub>16</sub> H <sub>17</sub> N <sub>7</sub> O <sub>8</sub> | CoC <sub>16</sub> H <sub>17</sub> N <sub>7</sub> O <sub>8</sub> | CoC <sub>16</sub> H <sub>17</sub> N <sub>7</sub> O <sub>8</sub> |
| Formula weight                                                         | 494.30                                                          | 494.30                                                          | 494.30                                                          | 494.30                                                          | 494.30                                                          |
| Crystal system                                                         | Monoclinic                                                      | Monoclinic                                                      | Monoclinic                                                      | Monoclinic                                                      | Monoclinic                                                      |
| Space group                                                            | <i>P2<sub>1</sub>/c</i>                                         | <i>P2<sub>1</sub>/c</i>                                         | <i>P2<sub>1</sub>/c</i>                                         | <i>P2<sub>1</sub>/c</i>                                         | <i>P2<sub>1</sub>/c</i>                                         |
| <i>a</i> (Å)                                                           | 9.796(2)                                                        | 9.804(4)                                                        | 9.8515(18)                                                      | 9.865(2)                                                        | 9.8591(12)                                                      |
| <i>b</i> (Å)                                                           | 27.433(6)                                                       | 27.417(10)                                                      | 25.892(5)                                                       | 25.934(6)                                                       | 26.027(3)                                                       |
| <i>c</i> (Å)                                                           | 7.5962(17)                                                      | 7.659(3)                                                        | 8.1511(15)                                                      | 8.172(2)                                                        | 8.1886(10)                                                      |
| $\beta$ (deg)                                                          | 100.288(5)                                                      | 100.030(5)                                                      | 100.820(2)                                                      | 100.762(3)                                                      | 100.676(3)                                                      |
| <i>V</i> (Å <sup>3</sup> )                                             | 2008.5(7)                                                       | 2027.1(13)                                                      | 2042.2(6)                                                       | 2053.8(9)                                                       | 2064.8(4)                                                       |
| <i>Z</i>                                                               | 4                                                               | 4                                                               | 4                                                               | 4                                                               | 4                                                               |
| <i>D</i> <sub>calcd</sub> (g cm <sup>-3</sup> )                        | 1.635                                                           | 1.620                                                           | 1.608                                                           | 1.599                                                           | 1.590                                                           |
| <i>F</i> (000)                                                         | 1012                                                            | 1012                                                            | 1012                                                            | 1012                                                            | 1012                                                            |
| data collected                                                         | 15991                                                           | 14242                                                           | 15133                                                           | 15006                                                           | 17707                                                           |
| unique data                                                            | 3666                                                            | 4582                                                            | 4548                                                            | 4578                                                            | 3818                                                            |
| <i>R</i> (int)                                                         | 0.0488                                                          | 0.0393                                                          | 0.0321                                                          | 0.0346                                                          | 0.0627                                                          |
| GOF on <i>F</i> <sup>2</sup>                                           | 1.127                                                           | 0.972                                                           | 1.020                                                           | 0.970                                                           | 1.180                                                           |
| <i>R</i> <sub><i>I</i></sub> <sup>a</sup> [ <i>I</i> > 2σ( <i>I</i> )] | 0.0328                                                          | 0.0321                                                          | 0.0308                                                          | 0.0323                                                          | 0.0691                                                          |
| $\omega R_2^b$ (all data)                                              | 0.0869                                                          | 0.0873                                                          | 0.0845                                                          | 0.0888                                                          | 0.1317                                                          |

<sup>a</sup>  $R_I = \Sigma ||F_o| - |F_c|| / \Sigma |F_o|$ . <sup>b</sup>  $\omega R_2 = \{\Sigma [\omega(F_o^2 - F_c^2)^2] / \Sigma [\omega(F_o^2)^2]\}^{1/2}$

**Supplementary Table 2** | Table of crystallographic parameters for complex 2–5.

|                                                                 | Complex 2                                                        |                                                                  | Complex 3                                                       | Complex 4                                                       | Complex 5                                                       |
|-----------------------------------------------------------------|------------------------------------------------------------------|------------------------------------------------------------------|-----------------------------------------------------------------|-----------------------------------------------------------------|-----------------------------------------------------------------|
| T (K)                                                           | 153                                                              | 303                                                              | 123                                                             | 123                                                             | 123                                                             |
| Formula                                                         | C <sub>16</sub> H <sub>17</sub> N <sub>7</sub> O <sub>8</sub> Zn | C <sub>16</sub> H <sub>17</sub> N <sub>7</sub> O <sub>8</sub> Zn | C <sub>17</sub> H <sub>19</sub> CoN <sub>7</sub> O <sub>8</sub> | C <sub>18</sub> H <sub>23</sub> CoN <sub>7</sub> O <sub>9</sub> | C <sub>22</sub> H <sub>29</sub> CoN <sub>7</sub> O <sub>8</sub> |
| Formula weight                                                  | 500.74                                                           | 500.74                                                           | 508.32                                                          | 540.36                                                          | 578.45                                                          |
| Crystal system                                                  | Monoclinic                                                       | Monoclinic                                                       | Monoclinic                                                      | Triclinic                                                       | Monoclinic                                                      |
| Space group                                                     | <i>P</i> 2 <sub>1</sub> / <i>c</i>                               | <i>P</i> 2 <sub>1</sub> / <i>c</i>                               | <i>P</i> 2 <sub>1</sub> / <i>c</i>                              | <i>P</i> -1                                                     | <i>P</i> 2 <sub>1</sub> / <i>c</i>                              |
| <i>a</i> (Å)                                                    | 9.801(2)                                                         | 9.915(2)                                                         | 9.699(3)                                                        | 8.0370(16)                                                      | 11.000(2)                                                       |
| <i>b</i> (Å)                                                    | 27.120(5)                                                        | 26.133(5)                                                        | 27.857(9)                                                       | 15.043(3)                                                       | 16.030(3)                                                       |
| <i>c</i> (Å)                                                    | 7.7592(16)                                                       | 8.3197(17)                                                       | 7.707(2)                                                        | 18.574(4)                                                       | 15.347(3)                                                       |
| $\alpha$ (deg)                                                  | 90                                                               | 90                                                               | 90                                                              | 90.537(6)                                                       | 90                                                              |
| $\beta$ (deg)                                                   | 101.09(3)                                                        | 101.90(3)                                                        | 101.440(9)                                                      | 94.769(5)                                                       | 106.744(5)                                                      |
| $\gamma$ (deg)                                                  | 90                                                               | 90                                                               | 90                                                              | 92.761(4)                                                       | 90                                                              |
| V (Å <sup>3</sup> )                                             | 2023.8(7)                                                        | 2109.4(7)                                                        | 2040.9(11)                                                      | 2235.1(7)                                                       | 2591.4(9)                                                       |
| Z                                                               | 4                                                                | 4                                                                | 4                                                               | 4                                                               | 4                                                               |
| D <sub>calcd</sub> (g cm <sup>-3</sup> )                        | 1.643                                                            | 1.577                                                            | 1.654                                                           | 1.606                                                           | 1.483                                                           |
| <i>F</i> (000)                                                  | 1024                                                             | 1024                                                             | 1044                                                            | 1116                                                            | 1204                                                            |
| data collected                                                  | 16508                                                            | 19121                                                            | 18020                                                           | 19150                                                           | 23496                                                           |
| unique data                                                     | 4475                                                             | 4682                                                             | 4595                                                            | 8207                                                            | 5361                                                            |
| <i>R</i> (int)                                                  | 0.0549                                                           | 0.0524                                                           | 0.0573                                                          | 0.0279                                                          | 0.0418                                                          |
| GOF on <i>F</i> <sup>2</sup>                                    | 1.011                                                            | 1.038                                                            | 1.043                                                           | 1.095                                                           | 1.116                                                           |
| <i>R</i> <sub>I</sub> <sup>a</sup> [ <i>I</i> > 2σ( <i>I</i> )] | 0.0533                                                           | 0.0579                                                           | 0.0426                                                          | 0.0406                                                          | 0.0833                                                          |
| $\omega R_2^b$ (all data)                                       | 0.1332                                                           | 0.1578                                                           | 0.0898                                                          | 0.0983                                                          | 0.2006                                                          |

<sup>a</sup>  $R_I = \Sigma ||F_o| - |F_c|| / \Sigma |F_o|$ . <sup>b</sup>  $\omega R_2 = \{\Sigma [\omega(F_o^2 - F_c^2)^2] / \Sigma [\omega(F_o^2)^2]\}^{1/2}$

**Supplementary Table 3** | Table of crystallographic parameters for complex **2'**.

|                                                                        | Complex <b>2'</b> (on cooling)                                                 |                                                                                |
|------------------------------------------------------------------------|--------------------------------------------------------------------------------|--------------------------------------------------------------------------------|
| T (K)                                                                  | 303                                                                            | 193                                                                            |
| Formula                                                                | C <sub>16</sub> H <sub>8</sub> D <sub>9</sub> N <sub>7</sub> O <sub>8</sub> Zn | C <sub>16</sub> H <sub>8</sub> D <sub>9</sub> N <sub>7</sub> O <sub>8</sub> Zn |
| Formula weight                                                         | 509.74                                                                         | 509.74                                                                         |
| Crystal system                                                         | Monoclinic                                                                     | Monoclinic                                                                     |
| Space group                                                            | <i>P</i> 2 <sub>1</sub> / <i>c</i>                                             | <i>P</i> 2 <sub>1</sub> / <i>c</i>                                             |
| <i>a</i> (Å)                                                           | 9.871(2)                                                                       | 9.860(4)                                                                       |
| <i>b</i> (Å)                                                           | 26.022(6)                                                                      | 25.836(10)                                                                     |
| <i>c</i> (Å)                                                           | 8.286(2)                                                                       | 8.226(3)                                                                       |
| $\beta$ (deg)                                                          | 101.902(6)                                                                     | 102.973(10)                                                                    |
| V (Å <sup>3</sup> )                                                    | 2082.7(8)                                                                      | 2041.9(13)                                                                     |
| Z                                                                      | 4                                                                              | 4                                                                              |
| D <sub>calcd</sub> (g cm <sup>-3</sup> )                               | 1.597                                                                          | 1.629                                                                          |
| <i>F</i> (000)                                                         | 1024                                                                           | 1024                                                                           |
| data collected                                                         | 19070                                                                          | 18211                                                                          |
| unique data                                                            | 4679                                                                           | 4580                                                                           |
| <i>R</i> (int)                                                         | 0.0683                                                                         | 0.0749                                                                         |
| GOF on <i>F</i> <sup>2</sup>                                           | 1.062                                                                          | 1.022                                                                          |
| <i>R</i> <sub><i>I</i></sub> <sup>a</sup> [ <i>I</i> > 2σ( <i>I</i> )] | 0.0599                                                                         | 0.0590                                                                         |
| $\omega R_2^b$ (all data)                                              | 0.1700                                                                         | 0.1424                                                                         |

<sup>a</sup>  $R_I = \sum ||F_o| - |F_c|| / \sum |F_o|$ . <sup>b</sup>  $\omega R_2 = \{ \sum [\omega(F_o^2 - F_c^2)^2] / \sum [\omega(F_o^2)^2] \}^{1/2}$

**Supplementary Table 4** | Table of selected bond distances (Å) and torsion angles (°) in the low- and high-temperature phases of complex **1**.

| <b>1</b> (123 K)       |            | <b>1</b> (303 K)       |            |
|------------------------|------------|------------------------|------------|
| Co(1)-N(3)             | 2.1462(15) | Co(1)-N(3)             | 2.139(2)   |
| Co(1)-O(1)             | 2.1585(14) | Co(1)-O(1)             | 2.117(2)   |
| Co(1)-O(6)             | 2.1563(14) | Co(1)-N(1)             | 2.144(2)   |
| Co(1)-N(1)             | 2.1651(16) | Co(1)-O(6)             | 2.174(2)   |
| Co(1)-N(5)             | 2.1824(16) | Co(1)-N(5)             | 2.189(2)   |
| Co(1)-O(4)             | 2.2188(16) | Co(1)-O(4)             | 2.163(3)   |
| Co(1)-O(3)             | 2.1977(14) | Co(1)-O(3)             | 2.342(3)   |
| N(3)-Co(1)-O(6)-N(7)   | 143.43(10) | N(3)-Co(1)-O(6)-N(7)   | 150.40(18) |
| N(3)-Co(1)-O(1)-N(6)   | 149.03(10) | N(3)-Co(1)-O(1)-N(6)   | 147.72(19) |
| O(7)-C(13)-C(14)-C(15) | 171.44(15) | O(7)-C(13)-C(14)-C(15) | 71.6(7)    |



## Supplementary References

1. Sorai, M., Tsuji, K., Suga, H. & Seki, S. Studies on disc-like molecules I. Heat capacity of benzene hexa-n- hexanoate from 13 to 393 K. *Mol. Cryst. Liq. Cryst.* **59**, 33–58 (1980).
2. Maroncelli, M., Qi, S. P., Strauss, H. L. & Snyder, R. G. Nonplanar conformers and the phase behavior of solid n- alkanes. *J. Am. Chem. Soc.* **104**, 6237–6247 (1982).
3. Sorai, M. & Saito, K. Alkyl chain acting as entropy reservoir in liquid crystalline materials. *Chem. Rec.* **3**, 29–39 (2003).
4. Massiot, D. *et al.* Modelling one- and two-dimensional solid state NMR spectra. *Magn. Reson. Chem.* **40**, 70–76 (2002).
5. Takeda, S. *et al.* Restricted rotational motion of interlayer water molecules in vanadium pentoxide hydrate,  $V_2O_5 \cdot nD_2O$ , as studied by deuterium NMR. *Z. Naturforsch.* **57 a**, 419–424 (2002).
6. Sidhu, P. S. *et al.* A deuterium NMR study of guest molecular dynamics in tris(5-acetyl-3-thienyl) methane inclusion compounds. *Can. J. Chem.* **74**, 1784-1794 (1996).
7. Tycko, R. *Nuclear Magnetic Resonance Probes of Molecular Dynamics*. Kluwer Academic Publishers, the Netherlands, ISMN 0-7923-2795-0 (1994).
